# Supplementary material for: The revalidation of the diabetes treatment-related quality-of-life (DTR-QOL) questionnaire in Japan
Source: Springer Nature journal article supplement (doi:10.1007/s13340-018-0371-1), 2018-08-28
Supplement: MOESM1 [file 16078528]

**Supplementary Materials**

DTR-QOL Questionnaire

1. 現在の糖尿病治療法のため仕事や用事がさまたげられるのが困る。

*My current diabetes treatment interferes with my work and activities.*

1. 現在の糖尿病治療法のために行動範囲が狭くなるのが困る。

*My current diabetes treatment limits the scope of my activities.*

1. 現在の糖尿病治療法を時間通りに行う場所を見つけるのが難しい。

*It is difficult to find appropriate places to conduct my current diabetes treatment on time.*

1. 現在の糖尿病治療法のために団体行動や人づきあいがさまたげられるのが困る。

*My current diabetes treatment interferes with group activities and personal friendships.*

1. 現在の糖尿病治療法のために毎朝きまった時間に起きるのが負担である。

*It is a burden getting up at a certain time every morning for my current diabetes treatment.*

1. 現在の糖尿病治療法のために食事開始時間が制約されるのが負担である。

*I feel burdened that the start time of my meal is restricted due to my current diabetes treatment.*

1. 外食をする時は現在の糖尿病治療法を行うのが困難である。

*When I eat out, it is difficult to manage my current diabetes treatment.*

1. 現在の糖尿病治療法で食事の楽しみを奪われたと感じる。

*I feel like my current diabetes treatment takes away the enjoyment of eating.*

1. 現在の糖尿病治療法では、食欲を抑えることに苦労する。

*Curbing my appetite due to my current diabetes treatment gives me a hard time.*

1. 現在の糖尿病治療法を行うときにかかる手間が負担である。

*The time and effort to manage my current diabetes treatment are a burden.*

1. 現在の糖尿病治療法を行う時間がたえず気になり負担である。

*I am constantly preoccupied thinking about what time I need to conduct my current diabetes treatment during the day.*

1. 現在の糖尿病治療法による痛みが不快である。

*Pain due to my current diabetes treatment is uncomfortable.*

1. 現在の糖尿病治療法による胃腸症状（吐き気、おなら、下痢、腹痛など）が不快である。

*Gastrointestinal symptoms (nausea, passing gas, diarrhea, abdominal pain) due to my current diabetes treatment are uncomfortable.*

1. 現在の糖尿病治療法によって体重が増えたのが困る。

*Weight gain due to my current diabetes treatment troubles me.*

1. 現在の糖尿病治療法では低血糖が不安である。

*My current diabetes treatment makes me worry about hypoglycemia.*

1. 低血糖のためにこわい思いをする。

*Hypoglyecmic events make me scared.*

1. 低血糖のために困るときがある。

*I am sometimes bothered by the symptoms and management required due to hypoglycemia.*

1. 低血糖による症状が不快である。

*Symptoms due to hypoglycemia are uncomfortable.*

1. 血糖値が高くて不快な症状を感じる。

*I have uncomfortable symptoms due to hyperglycemia (high blood glucose).*

1. 血糖値が高くて悩んでいる。

*I am worried about my high blood glucose level.*

1. 血糖値が安定しない（高かったり、低かったりする）ことが不満である。

*I am dissatisfied that my blood glucose level is unstable (high and low).*

1. 現在の糖尿病治療法では合併症が進むのではないかと不安である。

*I am worried that complications might get worse with my current diabetes treatment.*

1. 現在の糖尿病治療法をしながら生きていくことを考えると不安になる。

*I get anxious thinking about continuing my current diabetes treatment for the rest of my life.*

1. 現在の糖尿病治療法を続けても、糖尿病は治らないかもしれないと思うとやりきれない。

*I find it unbearable to think that even if I continue my current diabetes treatment, my diabetes may not be cured.*

1. 現在の糖尿病治療法を続けていくと、効果（ききめ）が薄れてくるのではないかという不安がある。

*I am concerned that if I continue my current diabetes treatment, the efficacy (effectiveness) may diminish.*

1. 全体的に考えて現在の血糖コントロール状態に満足している。

*Overall, I am satisfied with my current blood sugar control (glycemic control).*

1. 現在の糖尿病治療法で、よい血糖コントロールを続けられる自信がある。

*With my current diabetes treatment, I am confident that I can maintain good blood glucose control.*

1. 現在の糖尿病治療法には、将来に対する希望がある。

*With my current diabetes treatment, I feel hopeful about my future.*

1. 糖尿病治療法としては、現在の方法に満足している。

*I am satisfied with my current diabetes treatment method.*

Note: English translations are for the readers’ understanding and have not undergone official Patient Reported Outcomes (PRO) translation processes or linguistic validation.
